# Supplementary material for: Human Mesenchymal Stem/Stromal Cells from Umbilical Cord Blood and Placenta Exhibit Similar Capacities to Promote Expansion of Hematopoietic Progenitor Cells In Vitro
Source: PubMed Central journal article supplement (PMC5840651; doi:10.1155/2017/6061729), 2017-11-09
Supplement: 6061729.f1.pdf [file 6061729.f1.pdf]

Supplementary figure 1.

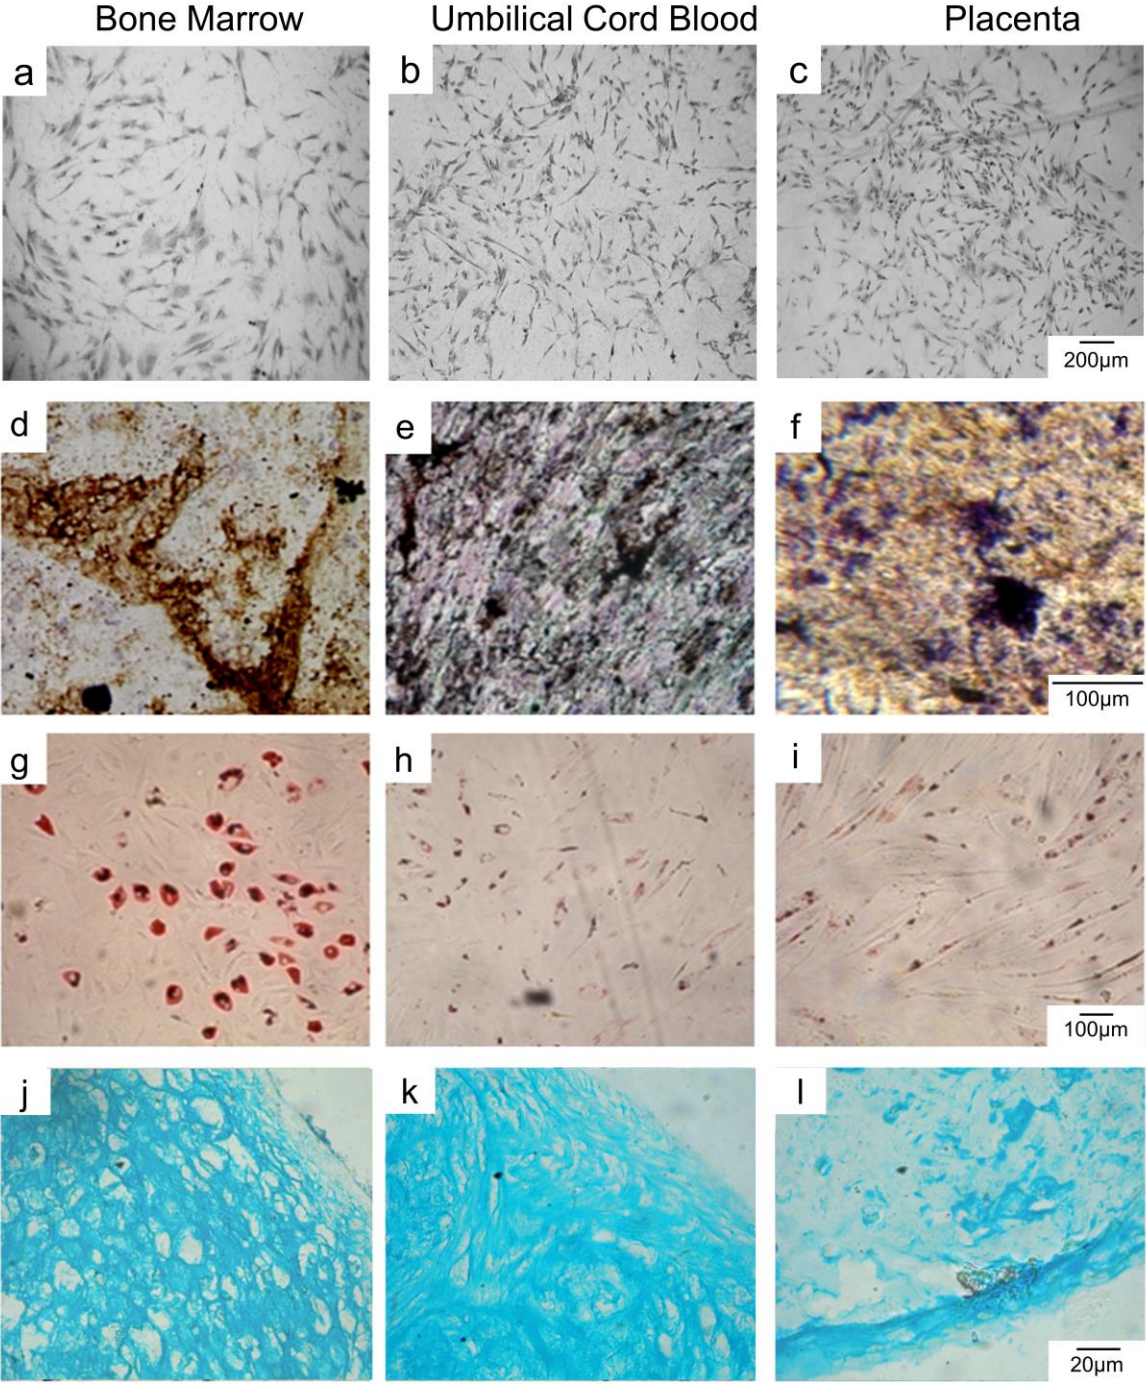

Supplementary table I. Ag expression profiles by MSCs from BM, UCB and PL

| Ag     | BM-MSCs   | UCB-MSCs | PL-MSCs   |
|--------|-----------|----------|-----------|
|        | %         | %        | %         |
| CD105  | 96.9±18.1 | 94.4±9.8 | 96±2.8    |
| CD73   | 98±2.3    | 97.6±2.3 | 72.7±27.3 |
| CD90   | 98±3.6    | 73.2±35  | 88.4±9    |
| CD14   | 1.6±2.3   | 0.9±1.2  | 1±1       |
| CD31   | 0.4±0.7   | 1±1.3    | 1.4±1.2   |
| CD34   | 1±1.2     | 0.4±0.6  | 1.9±2.2   |
| CD45   | 1.4±2.1   | 2.2±2.7  | 1.1±0.8   |
| HLA-DR | 0.3±0.3   | 0.9±0.7  | 1.3±1.5   |

Expression of cell markers was determined by flow cytometry. Results represent mean  $\pm$  SD and correspond to the percent (%) of cells positive for each particular Ag. (BM-MSCs n=6; UCB-MSCs n=6; PL-MSCs n=6).
